# Supplementary material
Source: PubMed Central journal article supplement (PMC9213412)
Supplement: 41396_2022_1233_MOESM1_ESM.pdf [file 41396_2022_1233_MOESM1_ESM.pdf]

1 **Supplementary Materials for Magnuson et al. “Active lithoautotrophic and methane-**  
2 **oxidizing microbial community in an anoxic, sub-zero, and hypersaline High Arctic**  
3 **spring”.**

4  
5 **Extended Materials and Methods**

6 i. Site description and sample collection

7 Lost Hammer (LH) spring discharges through a precipitated mineral salt tufa as described in  
8 previous publications (1-5) (Figure S1). LH emits gases composed of methane (50%), nitrogen  
9 (35%), carbon dioxide (10%), and trace hydrogen, helium, and short-chain alkanes (1). The  
10 spring sediments and water contain high concentrations of sulfate (100 000 mg/kg) as well as  
11 sulfide (<50 mg/kg), ammonia (2.55 mg/kg), nitrate/nitrite (2.87 mg/kg), and iron (13 000  
12 mg/kg) (1). Physical and geochemical parameters in the outlet (Table S1) have remained highly  
13 stable since 2005, allowing comparison among samples collected in different years.

14  
15 For this study, sediment samples (top ~10 cm) were collected in July 2017 and July 2019 with an  
16 ethanol-sterilized scoop, and stored in sterile Falcon tubes filled to maximum to avoid aerobic  
17 headspace. Sediment from July 2017 was used for metagenomic sequencing, and sediment from  
18 July 2019 was used for RNA and SAG sequencing. In parallel, sediment for RNA extractions  
19 was mixed with Zymo Research DNA/RNA Shield (Irvine, CA, USA). Samples were kept at  
20 <5°C during transportation to Montreal, after which they were stored at -20°C for DNA and  
21 RNA extraction and at -5°C (unfrozen) for SAG sequencing. Physical and geochemical  
22 parameters of the overlying water were measured *in situ* with a YSI Professional Plus  
23 Multiparameter instrument (Yellow Springs, OH, USA) and a PyroScience Piccolo2 oxygen

24 meter (Aachen, Germany). Ortho-phosphate and ammonia were measured *in situ* with  
25 CHEMetrics Inc. (Midland, VA, USA) test kits.  
26  
27 ii. DNA extraction, metagenome sequencing, and metagenome data analyses  
28 DNA was extracted from two 5 g portions of sediment with a Qiagen DNeasy PowerMax Soil  
29 Kit (Hilden, Germany). The resulting DNA from each sediment sample was concentrated with a  
30 Thermo Fisher Scientific SpeedVac Vacuum Concentrator (Waltham, MA, USA) and sequenced  
31 on a HiSeq2500 (2x126 base reads) (Illumina, San Diego, CA, USA) at The Centre for Applied  
32 Genomics (Toronto, ON, Canada). Low-quality reads and bases were trimmed with  
33 Trimmomatic (v0.38, settings LEADING:3 TRAILING:3 SLIDINGWINDOW:4:15) (6).  
34 Remaining reads were classified with Kaiju (v1.7.3, default settings, nr\_euk database) (7) and  
35 phyloFlash (v3.4) (8). The reads from the two sediment samples were co-assembled with  
36 Megahit (v1.1.3, setting meta-sensitive) (9) as well as assembled separately with metaSPAdes  
37 (v3.13.0, default settings) (10). Reads were mapped to each assembly with BMAP (v38.26,  
38 minid=0.95) and contigs longer than 5000 bp were binned with MetaBAT (v2.12.1) (11). Bin  
39 completeness and contamination was estimated with CheckM (v1.0.12) (12). The Megahit co-  
40 assembly and resulting bins were selected for downstream analysis based on sequencing statistics  
41 as determined by metaQUAST (v5.0.1) (13) and number of high- and medium-quality bins.  
42 Sequencing and assembly statistics can be found in Tables S2 and S3. The metagenome was  
43 annotated with the Joint Genome Institute's IMG/M system using KEGG, COG, and pfam  
44 databases (14, 15). Bins were classified with the Genome Taxonomy Database Toolkit (v1.3.0,  
45 reference data R05-RS95) (16). Phylogenomic trees were constructed with Anvi'o (v6.2) using  
46 the Bacteria\_71 collection of single copy genes (17). Amino acid sequences for all genes were

47 concatenated, with a total alignment length of 24 451 bp, and approximately-maximum-  
48 likelihood trees were constructed in FastTree with default settings within Anvi'o, with midpoint  
49 rooting. Additional analyses were as follows: FeGenie was used to identify iron-related genes  
50 (18); *amoA* and *pmoA* were distinguished by HMMer using FunGene Hidden Markov Models  
51 (19); hydrogenases were classified with hydDB (20). Reductive and oxidative DsrAB were  
52 classified as follows: DsrAB amino acid sequences were aligned against reference sequences  
53 from Muller et al. (21) using MUSCLE with default settings (22). Maximum likelihood  
54 phylogenetic trees were constructed in CLC Genomics Workbench (v. 12.0.3) using the WAG  
55 protein substitution model and 1000 bootstraps (Figure S9). DsrAB were classified as reductive  
56 or oxidative based on phylogenetic clustering and the presence of accessory proteins as in  
57 Anantharaman et al. (23).

58

59 iii. Single cell sorting, genome amplification, sequencing, and data analyses

60 Sediment was shipped on ice to the Single Cell Genomics Center at the Bigelow Laboratory for  
61 Ocean Sciences (East Boothbay, ME, USA) for SYTO-9 fluorescence-activated single-cell  
62 sorting (FACS), DNA extraction, and genome amplification with WGA-X (as described in  
63 Stepanauskas et al. (24)). The 16S rRNA gene was PCR amplified from the genomes (primers  
64 27F (25) and 1492R (26)) and sequenced at the Centre de Recherche at Université Laval  
65 (Quebec City, QC, Canada) on an Applied Biosystems 3730xl DNA Analyzer (Foster City, CA,  
66 USA). Obtained 16S rRNA sequences were annotated by BLAST with the SILVA rRNA  
67 database (release 138) (27). For whole genome sequencing, libraries were prepared with a  
68 Nextera XT DNA Library Prep Kit and sequenced on a MiSeq (Illumina) with MiSeq Reagent  
69 Kit v3 (600 cycles, 2x300 base reads). Low quality reads and bases were trimmed with BBDuk

70 (minimum Phred quality score 15, minimum length 30 bp) and contaminant human reads were  
71 removed with DeconSeq (28). Genomes were assembled with SPAdes (v3.13.1, settings --sc --  
72 careful) (29) and screened for contamination using JGI's Kmer Frequency Analysis tool and by  
73 read classification with Kaiju (v1.7.3) (7). Average nucleotide identity of the SAGs against other  
74 SAGs and metagenome bins was calculated with FastANI (v1.3) (30). Genome annotation was  
75 done as described for the metagenome.

76

77 iv. mRNA extraction, sequencing, and analysis

78 RNA was extracted in triplicate with a Zymo Research ZymoBIOMICS DNA/RNA Miniprep  
79 Kit from approximately 3 g sediment per extraction. Extracted samples were then treated with  
80 the Invitrogen Turbo DNA-free kit (Carlsbad, CA, USA) to remove contaminating DNA. The  
81 treated samples were then pooled and concentrated with a New England Biolabs Monarch RNA  
82 Cleanup Kit (Ipswich, MA, USA). Ribosomal RNA was depleted with a New England BioLabs  
83 NEBNext rRNA Depletion Kit (Bacteria) and a sequencing library was prepared with a New  
84 England BioLabs Ultra II RNA Library Prep Kit. The generated cDNA library was sequenced at  
85 The Center for Applied Genomics at the Hospital for Sick Children (Toronto, ON, Canada) on a  
86 NovaSeq 6000 (Illumina) with an S Prime 100-cycle flow cell (2x100 base reads). Reads were  
87 trimmed with Trimmomatic (settings LEADING:3 TRAILING:3 SLIDINGWINDOW:4:15  
88 MINLEN 50) and rRNA reads were removed with SortMeRNA (v4.2.0) (31). Human  
89 contaminant reads were removed with BBDMap using the BBTools RemoveHuman masked  
90 reference genome. Reads were classified with Kaiju (v1.7.3), and reads classified within  
91 common sequencing contaminant groups as in Sheik et al. (2018) (32) were removed (~81,500  
92 reads removed representing 77 genera; the genera with the most reads removed were

93 *Pseudomonas* (~12,000 reads), *Streptococcus* (~7000 reads), and *Ralstonia* (~6000 reads)).  
94 Remaining reads were aligned to metagenome contigs and SAG scaffolds with bowtie2  
95 (v2.3.5.1, with setting -very-sensitive-local) (33). Reads aligned to CDS regions were counted  
96 with HTSeq (v0.12.4) (34) and transcripts per million reads (tpm) was calculated to normalize  
97 expression values for each gene. For comparison of stress response genes in SAGs to those in  
98 related genomes, protein-coding genes from reference genomes were queried against LH SAG  
99 protein-coding genes with BLASTp using a cut-off e-value of 1e-15.

100

#### 101 v. Sequencing data availability

102 Sequencing reads, metagenome, MAGs, and SAGs were deposited in NCBI under BioProject  
103 PRJNA699472. JGI annotations of the metagenome and SAGs are available under GOLD Study  
104 ID Gs0135943. SAGs were also deposited individually in JGI (Table S4).

105

#### 106 vi. Gibbs free energy calculations

107 Gibbs free energy values were calculated using the method reported in Jones et al. (2018) (35)  
108 with the following parameters based on measurements reported in Table S1: 278.1° K, pH 6.4,  
109 7.39 M ionic strength,  $1.02 \times 10^{-7}$  M CH<sub>4</sub>,  $3.81 \times 10^{-4}$  M NH<sub>3</sub>,  $8.61 \times 10^{-6}$  M H<sub>2</sub>S,  $1.57 \times 10^{-5}$  M  
110 O<sub>2</sub>,  $2.31 \times 10^{-5}$  M NO<sub>3</sub><sup>-</sup>, 1.04 M SO<sub>4</sub><sup>2-</sup>,  $4.11 \times 10^{-5}$  M CO<sub>2</sub>,  $3.16 \times 10^{-7}$  M H<sup>+</sup>,  $3.12 \times 10^{-5}$  M NO<sub>2</sub><sup>-</sup>,  
111 and 0.23 M Fe<sup>3+</sup>.

112

### 113 **Supplementary Results and Discussion**

114 *Discrepancy between recovered MAGs and SAGs*

115 Using the criteria of average nucleotide identity >95%, only one SAG was found to correspond  
116 to MAGs. Typically, more overlap between the two datasets would be expected, particularly for  
117 those taxa abundant in the microbial community (36); conversely, the SAGs appear to be  
118 enriched for taxa at low abundance in the metagenome. In the following sections we will discuss  
119 possible reasons as to why this occurred.

120

121 Firstly, multiple selection steps occurred during generation of the SAGs that may have excluded  
122 or did exclude genomes from taxa abundant in the metagenome and MAGs. While 365 events  
123 (cells) were sorted during single cell sorting, only the 95 wells with the greatest estimated  
124 genome amplification (based on fluorescence during the amplification reaction) were selected for  
125 further analysis. This may have resulted in a biased selection of cells: for example, selecting for  
126 those genomes most responsive to the MDA reaction or those most resistant to environmental  
127 fluxes that may have occurred during transportation or sorting. Additionally, after an initial  
128 round of 16S rRNA Sanger sequencing, some wells with highly similar (>98%) 16S rRNA  
129 sequences were excluded from subsequent genomic sequencing to maximize sequencing  
130 coverage on the remaining wells. This included several *Halomonas* and *Desulfobulbaceae*  
131 genomes represented by MAGs, therefore potentially reducing the number of SAGs that may  
132 have corresponded to MAGs. As a result of these filtering steps, SAGs corresponding to MAGs  
133 may have been excluded and low-abundance taxa including archaeal genomes may have been  
134 enriched.

135

136 Secondly, 20% of reads map to the high- and medium-quality MAGs, due in part to stringent  
137 quality control during binning (i.e. only contigs >5000 bp were binned). As a result, while the

138 MAGs broadly represent the taxonomic groups present in the metagenome, they represent only a  
139 portion of the sum diversity. Therefore, this restrictive binning process in combination with the  
140 relatively high number of SAGs corresponding to taxa at low abundance in the metagenome may  
141 also have contributed to the discrepancy.

142

143 Thirdly, the samples collected for metagenomic analysis and for SAG sequencing were collected  
144 in different years (2017 vs. 2019, respectively). This was necessitated by the small amount of  
145 sediment removed during sampling to avoid disturbing the site in combination with the low  
146 biomass of the sediment, requiring relatively high amounts of sample for processing. While the  
147 physical and geochemical parameters of the spring have remained stable for the ~15 years that  
148 we have studied the spring, including the measurements taken in 2017 and 2019, we can't  
149 exclude the possibility of minor changes in the spring that could have affected the microbial  
150 community sampled. Additionally, due to the low biomass and high salinity of the sediment, it is  
151 difficult to extract DNA. Biases introduced by the differing processing steps during MAG and  
152 SAG sequencing (for example, DNA extraction vs. separation of cells from sediment) may  
153 therefore have had outside effects.

154

155 To summarize, we suggest several factors potentially contributing to the discrepancy between  
156 MAGs and SAGs: 1) Selection during generation of SAGs, 2) Stringent binning criteria, and 3)  
157 Differences in input samples and biases introduced by differing experimental procedures. We  
158 conclude by noting that although there is a discrepancy between the MAGs and SAGs, there is  
159 overlap between the two samples additional to what was discussed in the manuscript. In addition  
160 to the corresponding SAG and MAG noted in the manuscript, two additional SAGs had 16S

161 rRNA sequences >98% identical to unbinned 16S rRNA sequences, and nearly all taxonomic  
162 groups represented by the SAGs were also present in the metagenome reads and 16S sequences  
163 as classified by kaiju and PhyloFlash (with the sole exception of Iainarchaeota reads).  
164 Additionally, comparison of 16S rRNA sequences in the SAGs to previous 16S rRNA  
165 sequencing from over ten years ago (1) identified common sequences (>98%) between the two  
166 datasets, including sequences for *Halomonas*, ANME-1, and *Iainarchaeota*, suggesting that the  
167 discrepancy is more likely due to the potential technical factors discussed above rather than  
168 significant changes in the microbial community. The relative abundances of the microbial  
169 community represented in the metagenome are consistent with those observed in previous  
170 CARD-FISH and 16S rRNA and metagenomic sequencing (1, 2). We therefore suggest that the  
171 metagenome and MAGs more accurately represent the taxa abundant in the microbial  
172 community, whereas the SAGs are disproportionately enriched in low-abundance bacteria and  
173 archaea due to the potential factors discussed above.

174

175

176

177

178

179

180

181

182

183



184 **Supplementary Figures and Tables**

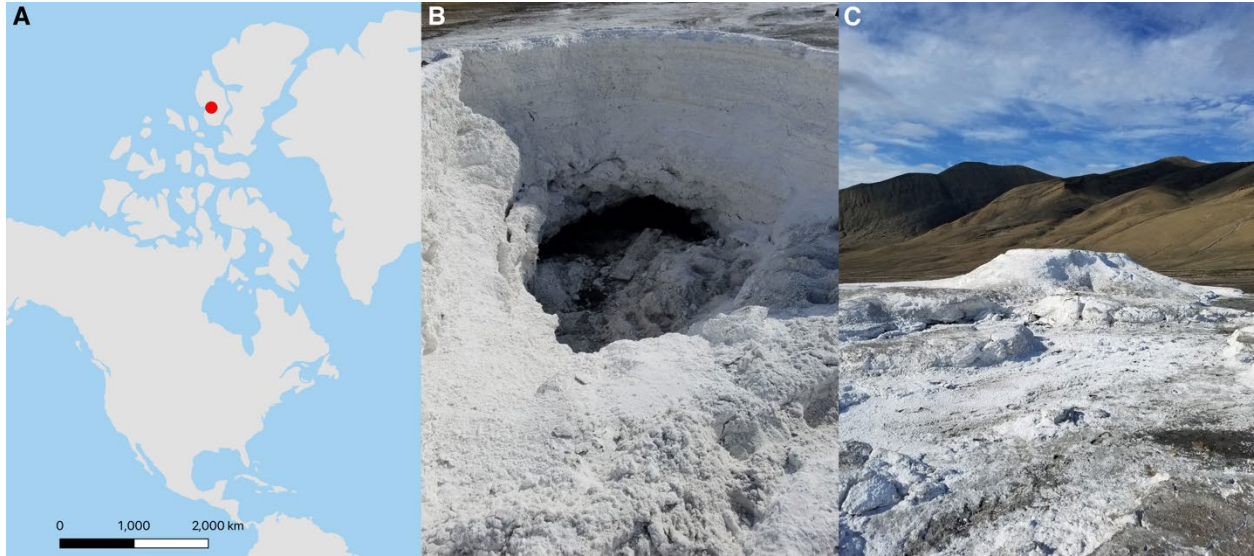

185

186 **Figure S1.** A. Location of the LH spring on Axel Heiberg Island in the Canadian High Arctic.

187 Map generated in QGIS with the Natural Earth dataset. B. View looking into the LH salt tufa to

188 the spring source (July 2019). C. View of the LH tufa and outflow channels (July 2019).

189

190

191

192

193

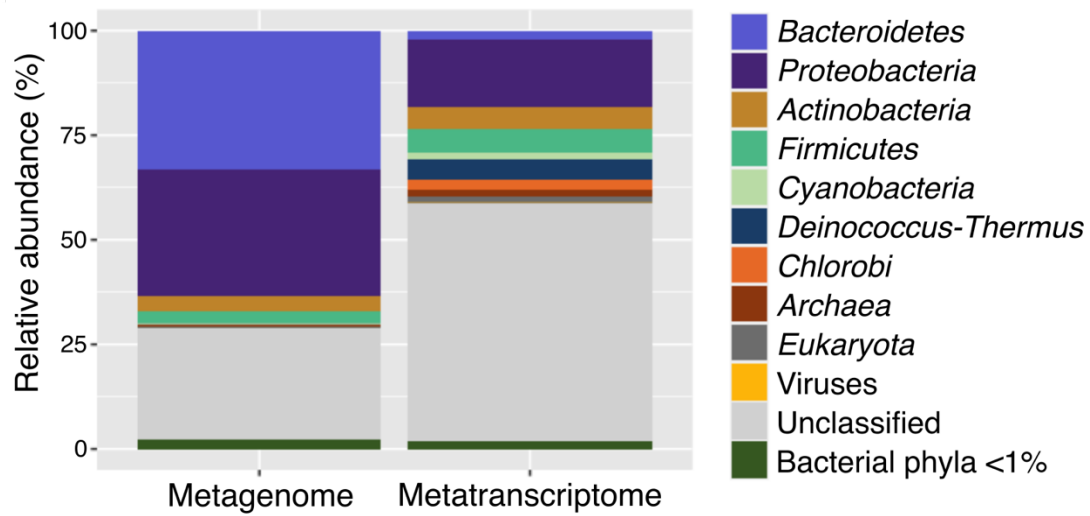

194

195 **Figure S2.** Taxonomic classification of metagenome and metatranscriptome reads. Reads were  
 196 classified by Kaiju using the NCBI non-redundant database. Metagenome reads are an average of  
 197 the relative abundance in duplicate samples.

198

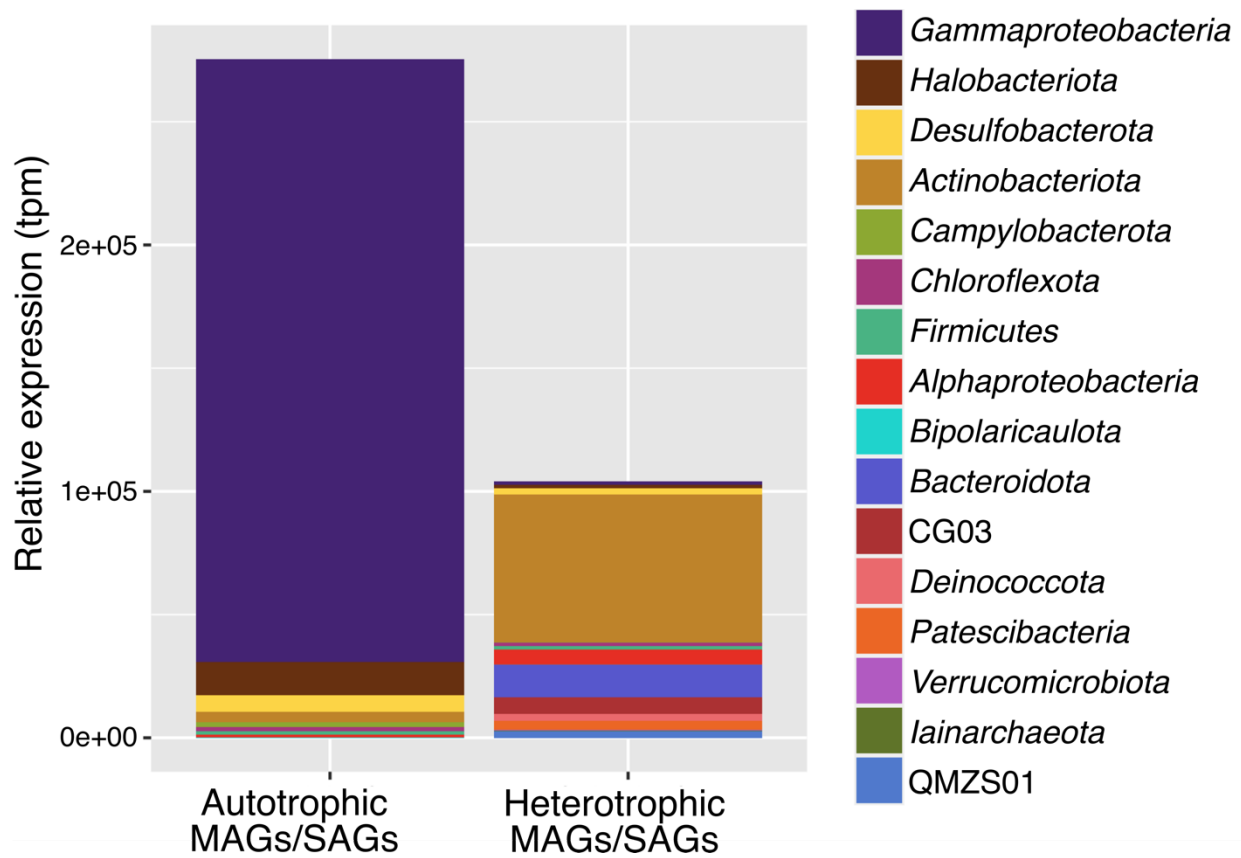

199

200 **Figure S3.** Relative expression (tpm) attributed to MAGs and SAGs containing CO<sub>2</sub>-fixation  
 201 genes (autotrophic MAGs/SAGs) and those without (heterotrophic MAGs/SAGs). Unbinned  
 202 genes with mapped transcripts were omitted from this analysis.

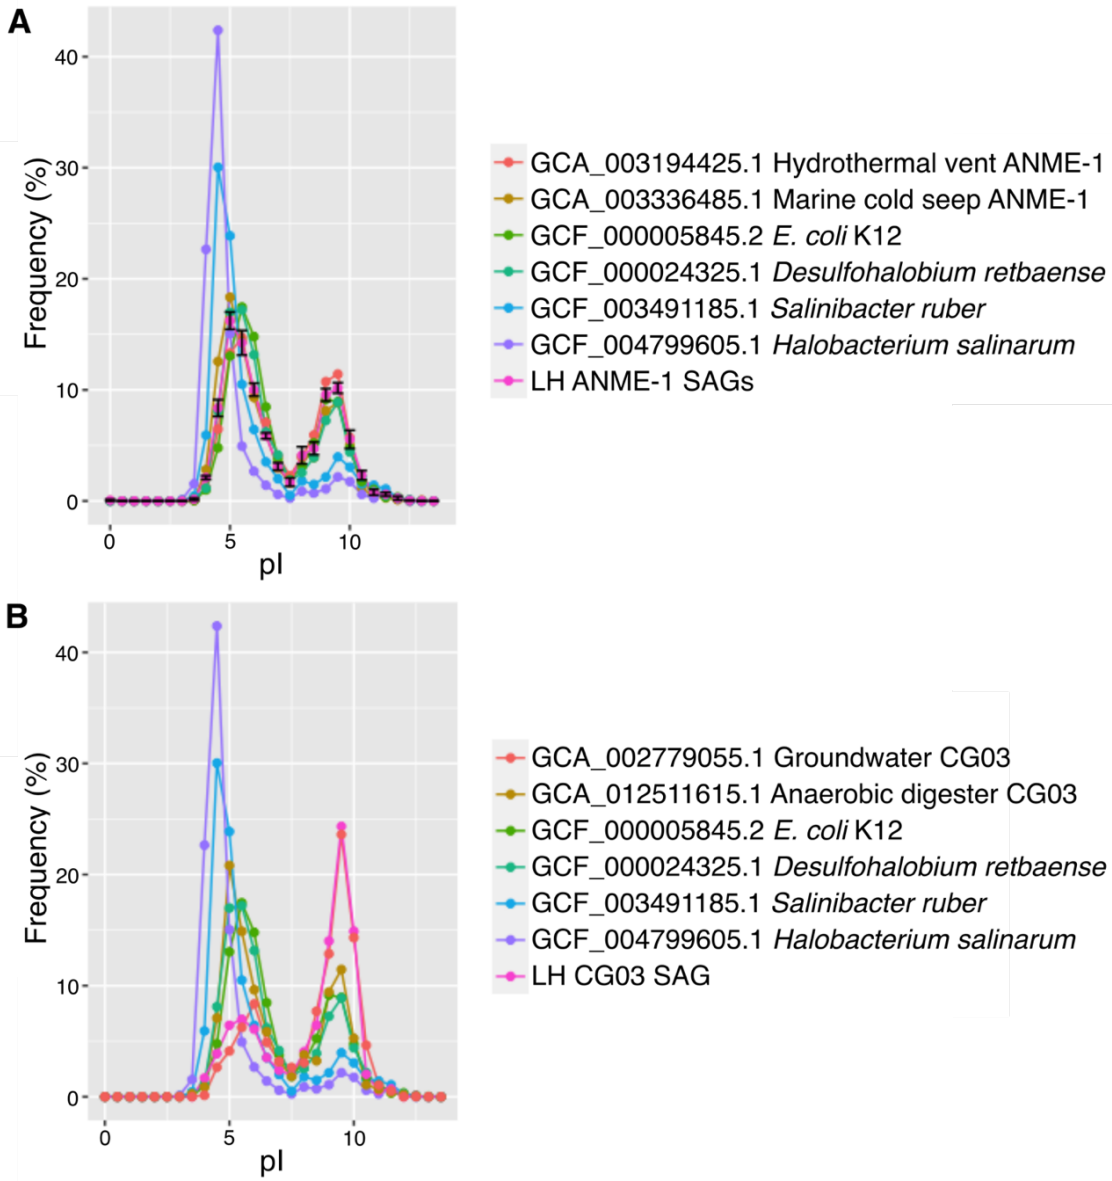

203

204 **Figure S4.** Comparison of predicted protein isoelectric points for A. ANME-1 SAGs S10-S14  
 205 and B. CG03 SAG S2. Protein isoelectric points were calculated with the ExPASy Compute  
 206 pI/MW online tool. Genomes for comparison (based on similar analysis in Nigro et al. (37))  
 207 include microorganisms known to accumulate salts through the “salting-in” osmoregulation  
 208 strategy (*Salinibacter ruber* and *Halobacterium salinarum*) and those that do not accumulate  
 209 salts (*E. coli* K12 and *Desulfohalobium retbaense*).

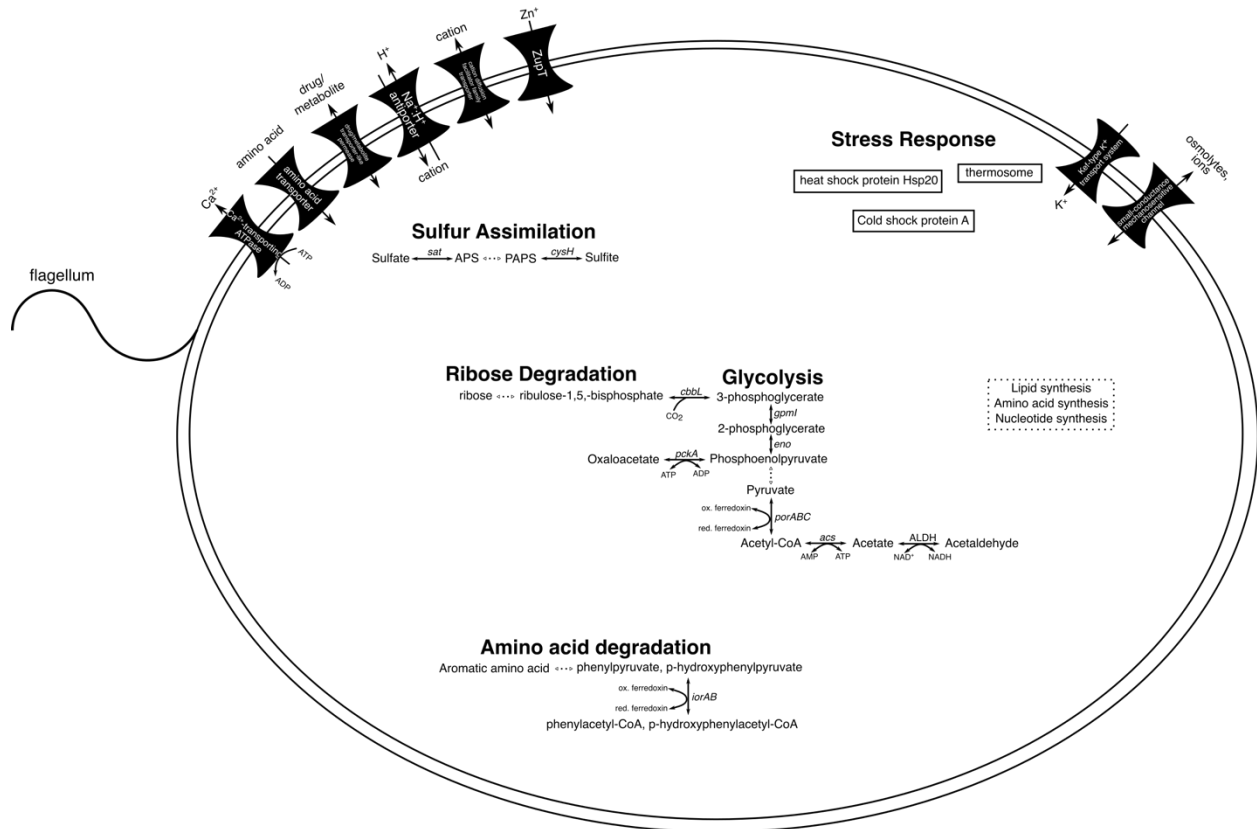

210

211 **Figure S5.** Metabolic reconstruction of *Iainarchaeia* SAG S9 (670822 bp, 52.9% completeness,  
 212 0% contamination). Solid lines represent genes present within the genome, and dashed lines  
 213 indicate steps or pathways absent from the genome. Table S15 contains a complete list of  
 214 annotated genes represented in this figure.

215



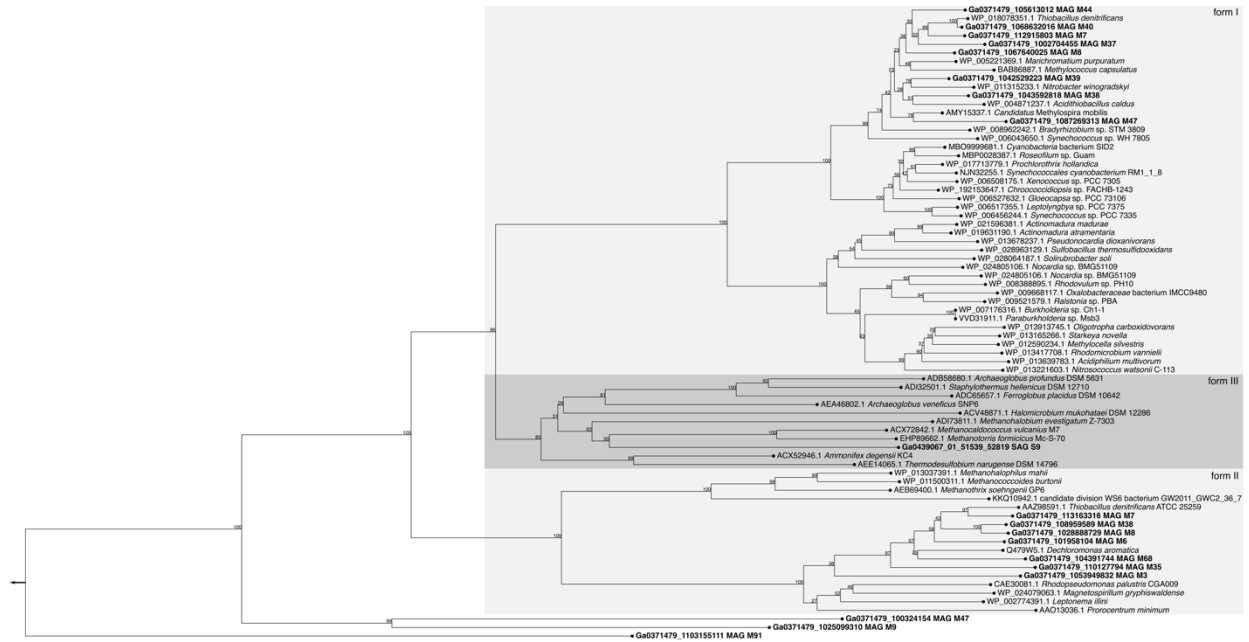

229

230 **Figure S7.** Maximum likelihood phylogenetic tree of RbcL/CbbL sequences. The tree was  
 231 constructed in CLC Genomics Workbench with 1000 bootstraps and WAG substitution model  
 232 using reference sequences from NCBI. A RubisCO-like protein sequence from  
 233 *Rhodospseudomonas palustris* TIE-1 (ACF00976.1) was used as an outgroup (direction indicated  
 234 by arrow).

235

236





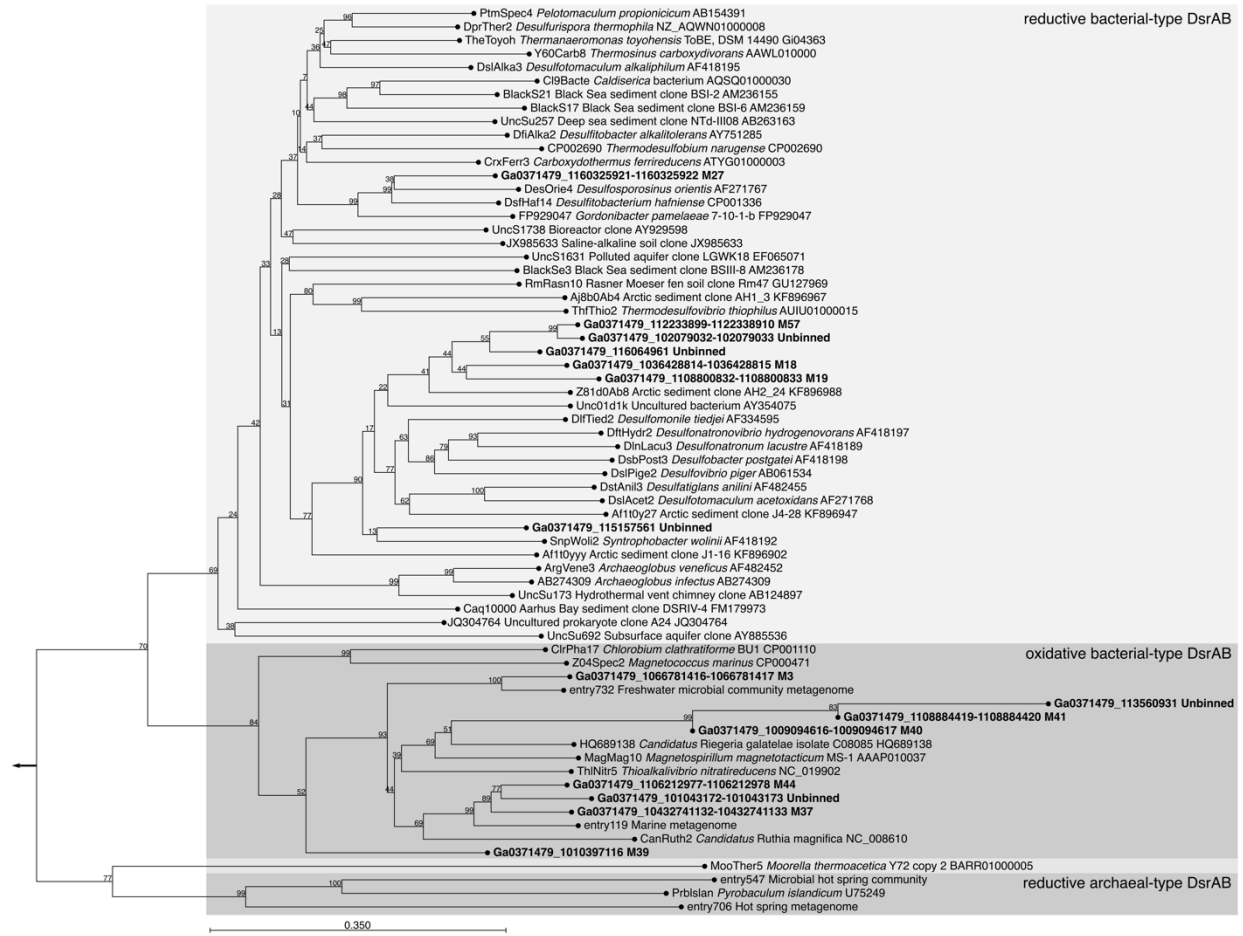

244

245 **Figure S9.** Maximum likelihood phylogenetic tree of DsrAB. The tree was constructed in CLC

246 Genomics Workbench with 1000 bootstraps and WAG substitution model using reference

247 sequences from Muller et al. (2015). Sequence names include the gene IDs and MAG number

248 where applicable. A sequence from eggNOG group COG2221 (*Campylobacter ureolyticus*

249 JFJK01000015\_gene476) was used as an outgroup (direction indicated by arrow).

250

251

252

253

254

255 **Table S1 (xlsx).** Physical and geochemical parameters of Lost Hammer water and sediment.

256 Located in Supplementary Tables xlsx file.

257

258 **Table S2.** Metagenome and metatranscriptome sequencing statistics.

| <b>DNA/RNA</b> | <b>Sample (NCBI ID)</b> | <b>Sequencing platform</b> | <b>Read length</b> | <b>Raw read pairs</b> | <b>Read pairs after quality control</b> |
|----------------|-------------------------|----------------------------|--------------------|-----------------------|-----------------------------------------|
| DNA            | SRR13628066             | Illumina HiSeq2500         | 2x126              | 116844950             | 116746762                               |
| DNA            | SRR13628065             | Illumina HiSeq2500         | 2x126              | 107914225             | 107647735                               |
| RNA            | SRR13633097             | Illumina NovaSeq6000       | 2x100              | 9009952               | 4233149                                 |

259

260

261

262

263

264

265

266

267

268

269

270

271

272

273

274 **Table S3.** Metagenomic assembly statistics.

|                                                                                         |                |
|-----------------------------------------------------------------------------------------|----------------|
| <b>Assembler</b>                                                                        | Megahit v1.1.3 |
| <b># contigs</b>                                                                        | 1620755        |
| <b># contigs &gt;= 1000 bp</b>                                                          | 276578         |
| <b># contigs &gt;= 5000 bp</b>                                                          | 36050          |
| <b># contigs &gt;= 10000 bp</b>                                                         | 14841          |
| <b># contigs &gt;= 25000 bp</b>                                                         | 3946           |
| <b># contigs &gt;= 50000 bp</b>                                                         | 1251           |
| <b>Total length (bp)</b>                                                                | 1599970111     |
| <b>GC %</b>                                                                             | 51.63          |
| <b>N50</b>                                                                              | 2968           |
| <b>N75</b>                                                                              | 1032           |
| <b>L50</b>                                                                              | 67307          |
| <b>L75</b>                                                                              | 264669         |
| <b>% reads mapping to contigs (average of two samples)</b>                              | 89.7           |
| <b>% reads mapping to contigs &gt; 5000 bp</b>                                          | 67.9           |
| <b>Average coverage of metatranscriptome against the metagenome (reads/base)</b>        | 0.093 ± 59     |
| <b>Average coverage of metatranscriptome against CDS with mapped reads (reads/base)</b> | 13 ± 604       |

275  
276  
277  
278  
279  
280  
281  
282  
283

284 **Table S4 (xlsx).** SAG supplemental information. Located in Supplementary Tables xlsx file.

285

286 **Table S5 (xlsx).** MAG supplemental information. Located in Supplementary Tables xlsx file.

287

288 **Table S6 (xlsx).** Relative expression for KEGG, COG, and pfam IDs. Located in Supplementary  
289 Tables xlsx file.

290

291 **Table S7 (xlsx).** Taxonomic classification of genes of interest with mapped transcripts. Located  
292 in Supplementary Tables xlsx file.

293

294 **Table S8 (xlsx).** Gene presence and expression in medium-quality MAGs. Located in  
295 Supplementary Tables xlsx file.

296

297 **Table S9 (xlsx).** Complete list of genes with mapped transcripts. Located in Supplementary  
298 Tables xlsx file.

299

300

301

302

303

304

305

306

307 **Table S10.** Gibbs free energy of redox pairs present in LH. Values were calculated using the  
 308 methodology in Jones et al. (2018) (35) (additional details in Supplementary Methods). These  
 309 values should be considered preliminary estimates as some parameter concentrations are based  
 310 on single-year measurements.

| Redox pair                                                                      | $\Delta G$ reaction (kJ/mol electron <sup>-1</sup> ) |
|---------------------------------------------------------------------------------|------------------------------------------------------|
| H <sub>2</sub> /O <sub>2</sub>                                                  | -111.9                                               |
| H <sub>2</sub> /NO <sub>3</sub> <sup>-</sup> (to NH <sub>3</sub> )              | -61.3                                                |
| N <sub>2</sub> /NO <sub>3</sub> <sup>-</sup> (to NO <sub>2</sub> <sup>-</sup> ) | -68.1                                                |
| H <sub>2</sub> /SO <sub>4</sub> <sup>2-</sup>                                   | -3.0                                                 |
| H <sub>2</sub> /CO <sub>2</sub>                                                 | -9.1                                                 |
| H <sub>2</sub> S/O <sub>2</sub>                                                 | -109.0                                               |
| H <sub>2</sub> S/NO <sub>3</sub> <sup>-</sup>                                   | -93.8                                                |
| Fe <sup>2+</sup> /O <sub>2</sub>                                                | -16.0                                                |
| NH <sub>3</sub> /O <sub>2</sub>                                                 | -52.9                                                |
| NH <sub>3</sub> /NO <sub>3</sub> <sup>-</sup>                                   | -90.8                                                |
| NH <sub>3</sub> /SO <sub>4</sub> <sup>2-</sup>                                  | -56.5                                                |
| CH <sub>4</sub> /O <sub>2</sub>                                                 | -205.7                                               |
| CH <sub>4</sub> /NO <sub>3</sub> <sup>-</sup>                                   | -32.4                                                |
| CH <sub>4</sub> /SO <sub>4</sub> <sup>2-</sup>                                  | 6.1                                                  |

311  
 312  
 313  
 314  
 315  
 316  
 317  
 318

319 **Table S11 (xlsx).** Stress response gene comparison to related genomes. Located in  
320 Supplementary Tables xlsx file.  
321  
322 **Table S12 (xlsx).** Gene content of MAGs. Located in Supplementary Tables xlsx file.  
323  
324 **Table S13 (xlsx).** Gene content of SAGs. Located in Supplementary Tables xlsx file.  
325  
326 **Table S14 (xlsx).** ANME-1 composite genome gene content. Located in Supplementary Tables  
327 xlsx file.  
328  
329 **Table S15 (xlsx).** *Iainarchaeia* sp. S9 gene content. Located in Supplementary Tables xlsx file.  
330  
331 **Table S16 (xlsx).** QMZS01 composite genome gene content. Located in Supplementary Tables  
332 xlsx file.  
333  
334 **Table S17 (xlsx).** CG03 sp. S2 gene content. Located in Supplementary Tables xlsx file.  
335  
336 **Table S18 (xlsx).** Metagenome copy number and total relative expression of genes of interest.  
337 Located in Supplementary Tables xlsx file.  
338  
339  
340  
341

342 **References**

- 343 1. Niederberger TD, Perreault NN, Tille S, Lollar BS, Lacrampe-Couloume G, Andersen D, et al.  
344 Microbial characterization of a subzero, hypersaline methane seep in the Canadian High Arctic.  
345 ISME J. 2010;4(10):1326-39.
- 346 2. Lay CY, Mykytczuk NC, Yergeau E, Lamarche-Gagnon G, Greer CW, Whyte LG. Defining  
347 the functional potential and active community members of a sediment microbial community in a  
348 high-Arctic hypersaline subzero spring. Appl Environ Microbiol. 2013;79(12):3637-48.
- 349 3. Lamarche-Gagnon G, Comery R, Greer CW, Whyte LG. Evidence of *in situ* microbial activity  
350 and sulphidogenesis in perennially sub-0 degrees C and hypersaline sediments of a high Arctic  
351 permafrost spring. Extremophiles. 2015;19(1):1-15.
- 352 4. Battler MM, Osinski GR, Banerjee NR. Mineralogy of saline perennial cold springs on Axel  
353 Heiberg Island, Nunavut, Canada and implications for spring deposits on Mars. Icarus.  
354 2013;224(2):364-81.
- 355 5. Ward MK, Pollard WH. A hydrohalite spring deposit in the Canadian high Arctic: a potential  
356 Mars analogue. Earth Planet Sci Lett. 2018;504:126-38.
- 357 6. Bolger AM, Lohse M, Usadel B. Trimmomatic: a flexible trimmer for Illumina sequence data.  
358 Bioinformatics. 2014;30(15):2114-20.
- 359 7. Menzel P, Ng KL, Krogh A. Fast and sensitive taxonomic classification for metagenomics  
360 with Kaiju. Nat Commun. 2016;7(1):1-9.
- 361 8. Gruber-Vodicka HR, Seah BKB, Pruesse E. phyloFlash: rapid small-subunit rRNA profiling  
362 and targeted assembly from metagenomes. mSystems. 2020;5(5):1-16.

363 9. Li D, Liu CM, Luo R, Sadakane K, Lam TW. MEGAHIT: an ultra-fast single-node solution  
364 for large and complex metagenomics assembly via succinct de Bruijn graph. *Bioinformatics*.  
365 2015;31(10):1674-6.

366 10. Nurk S, Meleshko D, Korobeynikov A, Pevzner PA. metaSPAdes: a new versatile  
367 metagenomic assembler. *Genome Res*. 2017;27(5):824-34.

368 11. Kang DD, Froula J, Egan R, Wang Z. MetaBAT, an efficient tool for accurately  
369 reconstructing single genomes from complex microbial communities. *PeerJ*. 2015;3:1-15.

370 12. Parks DH, Imelfort M, Skennerton CT, Hugenholtz P, Tyson GW. CheckM: assessing the  
371 quality of microbial genomes recovered from isolates, single cells, and metagenomes. *Genome*  
372 *Res*. 2015;25(7):1043-55.

373 13. Mikheenko A, Prjibelski A, Saveliev V, Antipov D, Gurevich A. Versatile genome assembly  
374 evaluation with QUAST-LG. *Bioinformatics*. 2018;34(13):i142-i150.

375 14. Chen IA, Chu K, Palaniappan K, Ratner A, Huang J, Huntemann M, et al. The IMG/M data  
376 management and analysis system v.6.0: new tools and advanced capabilities. *Nucleic Acids Res*.  
377 2020;49(D1):D751–D763.

378 15. Mukherjee S, Stamatis D, Bertsch J, Ovchinnikova G, Sundaramurthi JC, Lee J, et al.  
379 Genomes OnLine Database (GOLD) v.8: overview and updates. *Nucleic Acids Res*.  
380 2020;49(D1):D723-D733.

381 16. Chaumeil PA, Mussig AJ, Hugenholtz P, Parks DH. GTDB-Tk: a toolkit to classify genomes  
382 with the Genome Taxonomy Database. *Bioinformatics*. 2019;36(6):1925–7.

383 17. Eren AM, Esen OC, Quince C, Vineis JH, Morrison HG, Sogin ML, et al. Anvi'o: an  
384 advanced analysis and visualization platform for 'omics data. *PeerJ*. 2015;3:1-29.



- 385 18. Garber AI, Nealson KH, Okamoto A, McAllister SM, Chan CS, Barco RA, et al. FeGenie: a  
386 comprehensive tool for the identification of iron genes and iron gene neighborhoods in genome  
387 and metagenome assemblies. *Front Microbiol.* 2020;11:1-23.
- 388 19. Fish JA, Chai B, Wang Q, Sun Y, Brown CT, Tiedje JM, et al. FunGene: the functional gene  
389 pipeline and repository. *Front Microbiol.* 2013;4:1-14.
- 390 20. Sondergaard D, Pedersen CN, Greening C. HydDB: a web tool for hydrogenase classification  
391 and analysis. *Sci Rep.* 2016;6:1-8.
- 392 21. Muller AL, Kjeldsen KU, Rattei T, Pester M, Loy A. Phylogenetic and environmental  
393 diversity of DsrAB-type dissimilatory (bi)sulfite reductases. *ISME J.* 2015;9(5):1152-65.
- 394 22. Edgar RC. MUSCLE: multiple sequence alignment with high accuracy and high throughput.  
395 *Nucleic Acids Res.* 2004;32(5):1792-7.
- 396 23. Anantharaman K, Hausmann B, Jungbluth SP, Kantor RS, Lavy A, Warren LA, et al.  
397 Expanded diversity of microbial groups that shape the dissimilatory sulfur cycle. *ISME J.*  
398 2018;12(7):1715-28.
- 399 24. Stepanauskas R, Fergusson EA, Brown J, Poulton NJ, Tupper B, Labonte JM, et al.  
400 Improved genome recovery and integrated cell-size analyses of individual uncultured microbial  
401 cells and viral particles. *Nat Commun.* 2017;8(1):1-10.
- 402 25. Kuske CR, Barns SM, Grow CC, Merrill L, Dunbar J. Environmental survey for four  
403 pathogenic bacteria and closely related species using phylogenetic and functional genes. *J*  
404 *Forensic Sci.* 2006;51(3):548-58.
- 405 26. Miller CS, Handley KM, Wrighton KC, Frischkorn KR, Thomas BC, Banfield JF. Short-read  
406 assembly of full-length 16S amplicons reveals bacterial diversity in subsurface sediments. *PLoS*  
407 *One.* 2013;8(2):1-11.

- 408 27. Quast C, Pruesse E, Yilmaz P, Gerken J, Schweer T, Yarza P, et al. The SILVA ribosomal  
409 RNA gene database project: improved data processing and web-based tools. *Nucleic Acids Res.*  
410 2013;41:D590-596.
- 411 28. Schmieder R, Edwards R. Fast identification and removal of sequence contamination from  
412 genomic and metagenomic datasets. *PLoS One.* 2011;6(3):1-11.
- 413 29. Bankevich A, Nurk S, Antipov D, Gurevich AA, Dvorkin M, Kulikov AS, et al. SPAdes: a  
414 new genome assembly algorithm and its applications to single-cell sequencing. *J Comput Biol.*  
415 2012;19(5):455-77.
- 416 30. Jain C, Rodriguez RL, Phillippy AM, Konstantinidis KT, Aluru S. High throughput ANI  
417 analysis of 90K prokaryotic genomes reveals clear species boundaries. *Nat Commun.*  
418 2018;9(1):1-8.
- 419 31. Kopylova E, Noe L, Touzet H. SortMeRNA: fast and accurate filtering of ribosomal RNAs  
420 in metatranscriptomic data. *Bioinformatics.* 2012;28(24):3211-7.
- 421 32. Sheik CS, Reese BK, Twing KI, Sylvan JB, Grim SL, Schrenk MO, et al. Identification and  
422 removal of contaminant sequences from ribosomal gene databases: lessons from the Census of  
423 Deep Life. *Front Microbiol.* 2018;9:1-14.
- 424 33. Langmead B, Salzberg SL. Fast gapped-read alignment with Bowtie 2. *Nat Methods.*  
425 2012;9(4):357-9.
- 426 34. Anders S, Pyl PT, Huber W. HTSeq--a Python framework to work with high-throughput  
427 sequencing data. *Bioinformatics.* 2015;31(2):166-9.
- 428 35. Jones RM, Goordial JM, Orcutt BN. Low energy subsurface environments as extraterrestrial  
429 analogs. *Front Microbiol.* 2018;9:1-18.

- 430 36. Alneberg J, Karlsson CMG, Divne AM, Bergin C, Homa F, Lindh MV, et al. Genomes from  
431 uncultivated prokaryotes: a comparison of metagenome-assembled and single-amplified  
432 genomes. *Microbiome*. 2018;6(1):1-14.
- 433 37. Nigro LM, Hyde AS, MacGregor BJ, Teske A. Phylogeography, salinity adaptations and  
434 metabolic potential of the candidate division KB1 bacteria based on a partial single cell genome.  
435 *Front Microbiol*. 2016;7:1-9.
